# Supplementary material for: Improvements in the Appearance and Nutritional Quality of Tomato Fruits Resulting from Foliar Spraying with Silicon
Source: MDPI journal article supplement (doi:10.3390/foods13020223), 2024-01-10
Supplement: s1 [file s1]

## Supplementary materials

**Table S1 Basic physical and chemical properties of substrates**

| substrates                                           |       |                                          |                                                        |                                                                          |                                                               |                                                              |
|------------------------------------------------------|-------|------------------------------------------|--------------------------------------------------------|--------------------------------------------------------------------------|---------------------------------------------------------------|--------------------------------------------------------------|
| bulk<br>density<br>( $\text{kg}\cdot\text{m}^{-3}$ ) | pH    | EC<br>( $\text{mS}\cdot\text{cm}^{-1}$ ) | total<br>nitrogen<br>( $\text{g}\cdot\text{kg}^{-1}$ ) | alkaline<br>hydrolyzed<br>nitrogen<br>( $\text{mg}\cdot\text{kg}^{-1}$ ) | available<br>phosphorus<br>( $\text{mg}\cdot\text{kg}^{-1}$ ) | available<br>potassium<br>( $\text{mg}\cdot\text{kg}^{-1}$ ) |
| 521.860                                              | 7.800 | 2.100                                    | 1.612                                                  | 498.600                                                                  | 136.700                                                       | 346.500                                                      |

**Table S2 Effect of different levels of silicon on the content of amino acid components ( $\text{mg}\cdot\text{g}^{-1}$  DW) in tomato fruits**

| Amino acid<br>type | Treatments    |               |                           |                            |
|--------------------|---------------|---------------|---------------------------|----------------------------|
|                    | CK            | T1            | T2                        | T3                         |
| Phenylalanine      | 0.223±0.014ab | 0.213±0.007b  | 0.212±0.007b              | 0.234±0.013a               |
| Threonine          | 0.215±0.010ab | 0.203±0.009ab | 0.200±0.006b              | 0.222±0.015a               |
| Tryptophan         | 0.736±0.008c  | 0.767±0.021c  | 0.798±0.040ab             | 0.844±0.020a               |
| Leucine            | 0.482±0.017b  | 0.489±0.004ab | 0.485±0.008ab             | 0.505±0.010a               |
| Isoleucine         | 0.486±0.010b  | 0.487±0.010b  | 0.492±0.005b              | 0.514±0.010a               |
| Methionine         | 0.305±0.007c  | 0.333±0.008b  | 0.367±0.016a              | 0.360±0.022ab              |
| Tyrosine           | 0.030±0.001b  | 0.028±0.001c  | 0.030±0.001b              | 0.032±0.001a               |
| Valine             | 0.071±0.001a  | 0.069±0.003a  | 0.067±0.001a              | 0.068±0.001a               |
| Proline            | 0.052±0.001c  | 0.066±0.010b  | 0.075±0.007b              | 0.089±0.002a               |
| Cysteine           | 0.040±0.001a  | 0.033±0.002a  | 0.042±0.001a              | 0.148±0.186a               |
| Alanine            | 0.302±0.020c  | 0.332±0.011bc | 0.345±0.004b              | 0.413±0.029a               |
| Glutamate          | 8.285±0.271c  | 8.207±0.234c  | 10.455±0.247a             | 9.162±0.674b               |
| Glycine            | 0.131±0.018a  | 0.138±0.005a  | 0.145±0.027a              | 0.134±0.023a               |
| Glutamine          | 7.640±0.228b  | 8.712±0.720a  | 7.663±0.318b              | 8.670±0.402a               |
| Lysine             | 0.750±0.022b  | 0.752±0.031b  | 0.885±0.071a              | 0.851±0.040a               |
| Serine             | 0.199±0.027a  | 0.223±0.015a  | 0.226±0.031a              | 0.205±0.033a               |
| Asparagine         | 0.081±0.005a  | 0.086±0.003a  | 0.091±0.523a              | 0.092±0.016a               |
| Aspartate          | 2.222±0.129c  | 2.695±0.096b  | 3.737±0.110a              | 2.667±0.182b               |
| Histidine          | 0.870±0.076a  | 0.831±0.010a  | 0.883±0.042a              | 0.815±0.028a               |
| Arginine           | 0.352±0.030b  | 0.356±0.016b  | 0.428±0.028a              | 0.408±0.029a               |
| Cystine            | 0.090±0.006a  | 0.089±0.002a  | 0.090±0.006a              | 0.091±0.003a               |
| Total amino acids  | 23.561±0.515c | 25.109±0.533b | 27.987±0.711 <sup>a</sup> | 26.525±1.177 <sup>ab</sup> |

Note: The data are expressed as average values ± SE. Different lowercase letters indicate significant differences according to Duncan's multiple range tests ( $p < 0.05$ ). Abbreviations:

CK: 0  $\text{mmol}\cdot\text{L}^{-1}$  Si; T1: 0.6  $\text{mmol}\cdot\text{L}^{-1}$  Si; T2: 1.2  $\text{mmol}\cdot\text{L}^{-1}$  Si; T3: 1.8  $\text{mmol}\cdot\text{L}^{-1}$  Si.

**Table S3 RSD (Relative standard deviation), Recovery rate, LOD (Limit of detection), and LOQ (Limit of quantitation) of carotenoid by HPLC.**

| Carotenoid         | RSD<br>(%) | Recovery<br>rate (%) | LOD<br>/( $\mu\text{g}\cdot\text{g}$ ) | LOQ<br>/( $\mu\text{g}\cdot\text{g}$ ) |
|--------------------|------------|----------------------|----------------------------------------|----------------------------------------|
| Phytoene           | 4.52       | 95.53                | 0.10                                   | 0.33                                   |
| Lycopene           | 3.94       | 90.28                | 0.58                                   | 1.20                                   |
| $\beta$ - carotene | 4.40       | 92.91                | 0.15                                   | 0.43                                   |
| Lutein             | 5.51       | 93.64                | 0.15                                   | 0.45                                   |
| violaxanthin       | 3.15       | 95.86                | 0.20                                   | 0.62                                   |

Abbreviations: RSD: Relative Standard Deviation; LOD: Limit of detection; LOQ: Limit of quantitation.

**Table S4 RSD (Relative standard deviation), Recovery rate, LOD (Limit of detection), and LOQ (Limit of quantitation) of amino acids determined by LC-MS.**

| Amino acids   | RSD<br>(%) | Recovery rate<br>(%) | LOD<br>( $\text{ng}\cdot\text{mL}^{-1}$ ) | LOQ<br>( $\text{ng}\cdot\text{mL}^{-1}$ ) |
|---------------|------------|----------------------|-------------------------------------------|-------------------------------------------|
| Phenylalanine | 2.93       | 103.23               | 0.53                                      | 1.71                                      |
| Threonine     | 4.14       | 95.90                | 0.86                                      | 2.91                                      |
| Tryptophan    | 3.96       | 96.25                | 1.09                                      | 3.60                                      |
| Leucine       | 2.86       | 97.42                | 0.70                                      | 2.28                                      |
| Isoleucine    | 2.58       | 94.86                | 0.65                                      | 2.24                                      |
| Methionine    | 3.32       | 98.11                | 1.01                                      | 3.41                                      |
| Tyrosine      | 2.78       | 96.17                | 3.32                                      | 11.03                                     |
| Valine        | 2.33       | 96.18                | 1.39                                      | 4.57                                      |
| Proline       | 1.99       | 97.40                | 0.59                                      | 1.93                                      |
| Cysteine      | 2.89       | 96.31                | 1.07                                      | 3.96                                      |
| Alanine       | 3.62       | 98.48                | 1.15                                      | 3.83                                      |
| Glutamate     | 3.75       | 95.65                | 0.81                                      | 2.76                                      |
| Glycine       | 4.51       | 103.40               | 0.78                                      | 2.62                                      |
| Glutamine     | 3.16       | 95.72                | 0.88                                      | 2.82                                      |
| Lysine        | 5.66       | 101.01               | 0.26                                      | 0.80                                      |
| Serine        | 4.65       | 96.84                | 0.63                                      | 2.15                                      |
| Asparagine    | 2.95       | 94.23                | 3.01                                      | 10.03                                     |
| Aspartate     | 3.85       | 96.21                | 0.83                                      | 2.78                                      |
| Histidine     | 3.74       | 97.69                | 1.86                                      | 6.23                                      |
| Arginine      | 3.66       | 95.37                | 0.70                                      | 2.37                                      |
| Cystine       | 3.64       | 91.5                 | 1.14                                      | 3.74                                      |

Abbreviations: RSD: Relative Standard Deviation; LOD: Limit of detection; LOQ: Limit of quantitation.
